# Supplementary material for: The Impact of FTO Genetic Variants on Obesity and Its Metabolic Consequences is Dependent on Daily Macronutrient Intake
Source: MDPI journal article supplement (doi:10.3390/nu12113255), 2020-10-23
Supplement: s1 [file s1]

**Online Supporting Material.**

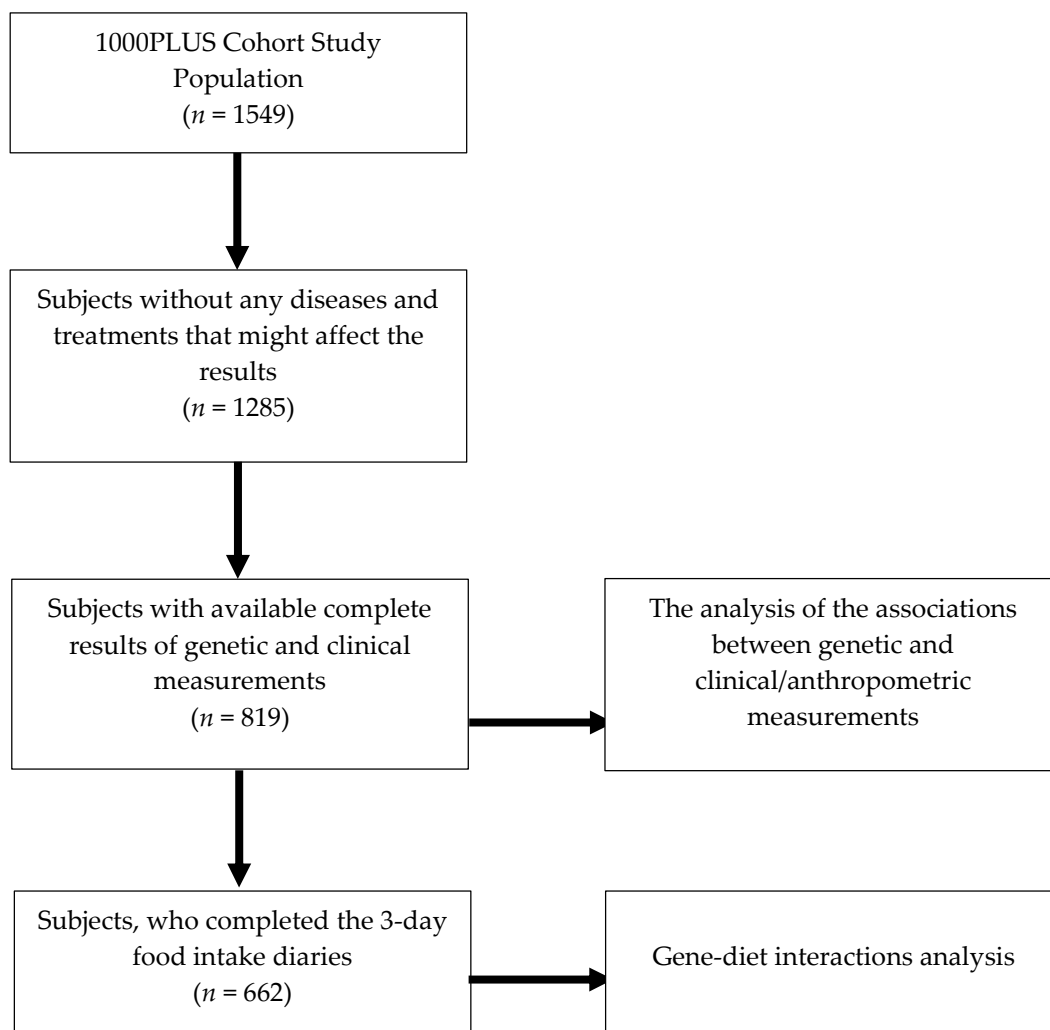

**Figure 1.** Study flowchart diagram.
